# Supplementary material
Source: PubMed Central journal article supplement (PMC5206905)
Supplement: NIHMS838612-supplement-03.pdf [file NIHMS838612-supplement-03.pdf]

573 **Supplementary Materials**

574 Online methods

575 Figures S1, S2, S3, S4, S5, S6, S7, S8, S9, S10, S11

576 Tables S1, S2, S3, S4, S5, S6, S7, S8, S9, S10, S11, S12

577 References (supplementary)

578

579 **Online methods**

580 **SEER data**

581 Surveillance, Epidemiology, and End Results (SEER) data were downloaded from

582 <http://seer.cancer.gov/data/>.

583

584 **Tumor / normal exon sequencing, DNA copy number, and RNA-sequencing data**

585 Genomic data was obtained from the TCGA data portal (<https://tcga-data.nci.nih.gov/tcga/>) and

586 from additional Broad Institute datasets<sup>39,50</sup>. Informed consent was obtained from all subjects by

587 local institutional review boards and consents were reviewed by the sequencing centers, per

588 TCGA guidelines. To visualize gene expression by mutation status for males and females, TCGA

589 data were downloaded and visualized using cBioPortal ([www.cbioportal.org](http://www.cbioportal.org))<sup>51,52</sup>.

590

591 **Mutation classification**

592 Tumor-associated DNA variants were called “truncating” if they resulted in nonsense, insertion,

593 deletion, translation start site, or nonstop mutations. Truncating and likely functional missense

594 (LOF) included all truncating mutations as well as missense mutations that occurred at the same

595 site in at least 3 patients (n=419 across the pan-cancer dataset, of which 9 were male-

596 predominant) or had a Cons 46-vertebrates score ([http://ucscbrowser.genap.ca/cgi-](http://ucscbrowser.genap.ca/cgi-bin/hgTrackUi?db=hg19&q=cons46way)

597 [bin/hgTrackUi?db=hg19&q=cons46way](http://ucscbrowser.genap.ca/cgi-bin/hgTrackUi?db=hg19&q=cons46way))<sup>53</sup> higher than 0.9 indicating high conservation across

598 species (n=3083, of which 124 were male-predominant).

599

600 **Permutation analysis**

601 For each set of events, the probability of observing the number of events seen in males was  
602 determined by a series of permutations. Within each tumor type, the probability that any given  
603 gene alteration would occur in a male was assumed to be directly related to the number of  
604 mutations across all males, divided by the total number of mutations across all samples. This  
605 controlled for the number of males in a set as well as the relative mutation rate on chrX in males  
606 vs females in the set. For instance, if 60% of coding mutations on chrX in the dataset for a tumor  
607 type were in males, then for any given chrX gene, assuming there is no selective advantage for  
608 males vs. females, we should see 60% of the events occurring in males. For each gene, the total  
609 number of events was counted and a random set of permutations was constructed, in which each  
610 event was randomly assigned a 'male' or 'female' value based on this calculated probability. For  
611 the pan-cancer analyses, the probability of an event being in a male was calculated on a per  
612 tumor type basis, and events were counted and permuted within each tumor type. Once the  
613 number of males in the permutation was calculated, it was compared against the observed data  
614 to see if the number of males randomly generated in this manner was greater than or equal to  
615 that observed in the data. For each gene, 1 million permutations were done, and the fraction of  
616 permutations with a greater than or equal number of male events was reported as the P value.  
617 Multiple hypothesis correction was then performed on the complete set of genes that were  
618 affected by the set of events examined, and genes with FDR <0.1 (by Benjamini-Hochberg false  
619 discovery rate correction) were reported as significant. For permutations on truncating and LOF  
620 mutations, this probability was calculated based on the coding mutation count of chrX. For  
621 permutations on copy-loss events, the frequency of copy-loss events on chrX was used. For the  
622 combined LOF/CN loss permutations, the sum of these two was used.

623

#### 624 **Log likelihood ratio test**

625 Assuming that the only factor differentiating the male mutation rate of a gene and the female  
626 mutation rate of a gene is the difference in the background mutation rate on chrX (i.e. assuming

627 there is no selective bias in males for mutating a gene), then the probability of a male having a  
 628 mutation in a gene should be directly related to the probability of a female having a mutation in a  
 629 gene, corrected for the number of copies of chrX in females (n=2) and males (n=1):

$$630 \quad p_{female} = r * p_{male}$$

631 Where  $r$  is the F/M ratio of coding mutations across chrX, i.e. if females in a set have twice the  
 632 number of coding mutations on chrX as males, it can be expected that any given gene on X  
 633 should be twice as likely to be mutated in a female patient vs. a male patient. For each test, the  
 634 actual F/M ratio of coding mutations on chrX in the analysis set was calculated and used.  
 635 Because there is a direct relationship between the probability of a male mutation in this model  
 636 and a female mutation, we can express the likelihood that the observed data is consistent with  
 637 this model using a single value of  $p$ :

$$638 \quad L_0 = \max((p_{male})^m (1-p_{male})^{M-m} (r * p_{male})^f (1-r * p_{male})^{F-f})$$

639 Where  $M$  and  $F$  are the total number of male and female patients, respectively, and  $m$  and  $f$  are  
 640 the number of mutated males and females, respectively. The alternative hypothesis is that there  
 641 are independent factors affecting males and females, in which case two values of  $p$  are needed to  
 642 calculate the likelihood that the data fits the model:

$$643 \quad L_1 = \max((p_{male})^m (1-p_{male})^{M-m} (p_{female})^f (1-p_{female})^{F-f})$$

644 Which can be maximized by using the observed mutation counts:

$$645 \quad L_1 = (m/M)^m (M-m/M)^{M-m} (f/F)^f (F-f/F)^{F-f}$$

646 The log-likelihood ratio ( $LLR$ ) is calculated simply by taking the log of the ratio of these two  
 647 numbers:

$$648 \quad LLR = \log(L_1/L_0)$$

649 Which, using Wilks's theorem, was converted to a P value for each gene. The Benjamini-  
650 Hochberg procedure for controlling the False Discovery Rate (FDR) was then applied, and genes  
651 with FDR <0.1 were reported as significant.

652

### 653 **Copy number determination by SNP array**

654 Probe-level signal intensities from Affymetrix SNP6 .CEL files for tumor samples across different  
655 cancer types were combined, calibrated, normalized, and segmented in uniform fashion as  
656 previously described<sup>50</sup>. Markers identified as having recurrent germline copy number variations  
657 using normal samples were excluded. For samples for which ABSOLUTE<sup>54</sup> purity/ploidy calls  
658 were available, copy numbers were scaled by a factor inversely proportional to the purity estimate  
659 to remove the effects of admixed normal cells, as previously described<sup>50</sup>. Copy number profiles  
660 were deconstructed into underlying somatic events using GISTIC<sup>55</sup>; only focal events with length  
661 less than 1 megabase were used to limit normalization bias between males and females on chrX.  
662 Copy number for a gene was determined by using the most extreme copy number among the  
663 markers spanning the gene. The threshold for calling somatic copy number events was chosen  
664 by considering the distribution of copy number across both male and female cohorts  
665 (Supplementary Figure 3). Because normalization decouples chrX overall copy number from that  
666 of the autosomes, retention or loss of the entire chrX was called by applying a threshold of 1.6 to  
667 a robust average of the un-normalized, calibrated signal across the X chromosome  
668 (Supplementary Figure 3). The maximum and minimum 0.2% probe-level signals were excluded.

669

### 670 **Power analysis**

671 The power calculation was performed using a binomial model similarly as previously described<sup>39</sup>.  
672 The power to detect a male-biased mutation can be determined by first calculating the maximum  
673 number of mutations in males,  $m_{\max}$ , that would be considered non-significant in the null model,  
674 based on an inverse binomial cumulative distribution function, given the desired bound on the

675 false discovery rate (<0.1), the total number of mutations in a gene in the entire cohort,  $n$  (a  
676 function of the fraction of patients with a mutation and the total number of patients), and the  
677 fraction of all events that occur in males (as opposed to in females) in the cohort, which  
678 determines the probability that a mutation will be in a male tumor,  $p_0$ . The power is then  
679 determined by the probability of discovering at least that many mutations in male patients under  
680 the alternate hypothesis, which adjusts  $p_0$  by the hypothesized increased relative risk of a  
681 mutation occurring in a male tumor,  $R_{\text{signal}}$ , the fold change compared to the null hypothesis.

$$682 \quad R_{\text{background}} = p_0 / (1 - p_0)$$

683

$$684 \quad R_{\text{total}} = R_{\text{background}} * R_{\text{signal}}$$

685

$$686 \quad p_{\text{alt}} = 1 / (1 + 1/R_{\text{total}})$$

687

688 To generate figures, we calculated the number of patients ( $N$ ) required for power to detect 80% of  
689 genes with a statistically significant male bias, given hypothetical values of  $R_{\text{signal}}$ ,  $n$ , and  $p_0$ .

690

### 691 **Y copy loss determination**

692 We calculated chrY coverage at a per-megabase level for paired tumor and normal sequencing  
693 data, and then normalized to total coverage of the exome. A region of chrY between bases  
694 29000001-58000000 was omitted due to poor coverage. An additional region, 13000001-  
695 14000000, was removed due to high incidence of misalignment. A biphasic pattern of copy  
696 number quantitation was observed in male samples (Supplementary Figure 6), with a distinct  
697 population of tumors demonstrating significant median copy loss compared to the paired normal  
698 sample. ChrY loss was therefore assigned to those samples with <25% in overall coverage of  
699 chrY in the tumor compared to the paired normal sample.

700

### 701 **Allele-specific expression analysis**

702 Exome sequencing and RNA-seq data from somatic and germline samples from GBM, LGG,  
703 HNSC, KIRC, LUSC, and LUAD sets from TCGA, and brain, lung, and whole blood sample sets  
704 from GTEx were analyzed. For each, allele-specific RNA-seq pileup counts were called at  
705 heterozygous germline sites and tumor sites from cancers (determined by exome sequencing)  
706 from the respective analysis. Duplicate, non-primary, soft clipped and Phred quality 0 reads were  
707 not included in the pileup count. For sites where at least 20 reads (tumor samples) or 8 reads  
708 (normal samples) were detected by RNA-seq, the count of the less frequent allele was divided by  
709 the total allele count to obtain the minor allele fraction. Data are represented as the average  
710 minor allele fraction for all sites in the indicated gene, or as the average of all sites in all genes in  
711 the 'non-escape' group.

712

### 713 **Analysis of GTEx male vs female expression data**

714 We obtained RNA-Seq expression data from the GTEx project as gene reads per sample by  
715 accessing the project's pipeline (<http://www.gtexportal.org/home/>). For each tissue, we  
716 normalized the signal across samples. The whole blood samples used were restricted to those  
717 collected ante mortem. There were 85 whole blood samples (25 female and 60 male) and 360  
718 brain samples (124 female and 233 male) that passed quality control and fit the selection criteria.  
719 We tested for bimodality of *ATRX* expression in the brain in two ways. First, we fit a Gaussian  
720 mixture model to the empirical densities using the R package "mixtools" ([http://cran.r-](http://cran.r-project.org/web/packages/mixtools/)  
721 [project.org/web/packages/mixtools/](http://cran.r-project.org/web/packages/mixtools/)), function normalmixEM with parameters: k=2, epsilon = 1e-  
722 08, maxit = 1000, maxrestarts=20, and assessed the distance between resulting means. Second,  
723 we tested for bimodality with a likelihood ratio test for bimodality in two-component mixtures. The  
724 method contrasts the likelihood of the data obtained under restricted and unrestricted maximum  
725 likelihood fits of mixture of normal distributions. Under the assumption of equal variance,  
726 bimodality solely depends on the mixture component weight and the ratio of the distance between  
727 means and the variance. With unequal variance, it is also determined by the ratio of variances.

728 We used R package "diptest" to test for multimodality ([http://cran.r-](http://cran.r-project.org/web/packages/diptest/)  
729 [project.org/web/packages/diptest/](http://cran.r-project.org/web/packages/diptest/)).

730

### 731 **Calculation of percentage excess male risk**

732 For a given gene in a specific disease, we calculated the excess male risk associated with loss-  
733 of-function mutation of a single gene on chrX. We cannot assume that the M:F ratio in our sample  
734 set is the same as the general population incidence of that disease, so we adjusted the overall  
735 M:F ratio to SEER data for each cancer in the US population. The fraction of the excess male risk  
736 in the disease attributable to a specific gene mutation was calculated as follows: (# males with the  
737 gene mutated in our dataset – (Z \* # of females with the gene mutated in our dataset)) / (# males  
738 in our dataset – (Z \* # of females in our dataset)); where Z = our dataset M:F ratio / SEER data  
739 M:F ratio.

740

### 741 ***Cnksr2* knockdown, western blotting, and soft agar colony assays**

742 Mouse *Cnksr2* or control RFP shRNA constructs (oligonucleotide sequences in Supplementary  
743 Table 12) were cloned per protocol (<http://www.addgene.org/tools/protocols/plko/>) into a pLKO.1  
744 vector modified to express a GFP reporter in place of the puromycin resistance gene. Lentivirus  
745 was produced and murine 3T3 cells (from ATCC, mycoplasma-free) were infected using standard  
746 protocols (Addgene) and GFP-positive cells were sorted after 7 days. Western blotting was  
747 performed as previously described<sup>56</sup> using antibodies recognizing phospho-ERK (Cell Signaling  
748 #4370), total ERK (Cell Signaling #9102), and tubulin (Sigma #T6074). Soft agar colony assay  
749 was performed as previously described<sup>57</sup>. After three weeks, random microscopy fields with an  
750 area of 3.29 mm<sup>2</sup> were scanned and colonies of minimum 50 um<sup>2</sup> in size were counted using a  
751 CellCelector (ALS, Germany).

752

### 753 **RNA-sequencing and gene set enrichment analysis (GSEA) in *Cnksr2* knock-down cells**

Total RNA was prepared using a MiRNeasy kit (Qiagen). Illumina sequencing libraries were prepared using Illumina TruSeq Stranded mRNA sample preparation kits from 500ng of purified total RNA according to the manufacturer's protocol. The finished dsDNA libraries were quantified by Qubit fluorometer, Agilent TapeStation 2200, and RT-qPCR using the Kapa Biosystems library quantification kit according to manufacturer's protocols. Uniquely indexed libraries were pooled in equimolar ratios and sequenced on an Illumina NextSeq500 with single-end 75bp reads by the Dana-Farber Cancer Institute Molecular Biology Core Facilities. Reads were aligned to the mm9 reference genome assembly using STAR (v25.1b) (<https://github.com/alexdobin/STAR>). FPKM expression values were calculated using cufflinks (v2.2.1) (<http://cole-trapnell-lab.github.io/cufflinks/>). Spearman correlation and principal component analysis were performed using VIPER (<https://bitbucket.org/cfce/viper/>). GSEA (<http://www.broadinstitute.org/gsea/>) was performed as previously described<sup>41,58</sup>. Network enrichment mapping was performed using Cytoscape (<http://www.cytoscape.org/>).

## Methods-only References

- 50 Zack, T. I. *et al.* Pan-cancer patterns of somatic copy number alteration. *Nature genetics* **45**, 1134-1140, doi:10.1038/ng.2760 (2013).
- 51 Gao, J. *et al.* Integrative analysis of complex cancer genomics and clinical profiles using the cBioPortal. *Science signaling* **6**, pl1, doi:10.1126/scisignal.2004088 (2013).
- 52 Cerami, E. *et al.* The cBio cancer genomics portal: an open platform for exploring multidimensional cancer genomics data. *Cancer discovery* **2**, 401-404, doi:10.1158/2159-8290.CD-12-0095 (2012).
- 53 Siepel, A. *et al.* Evolutionarily conserved elements in vertebrate, insect, worm, and yeast genomes. *Genome research* **15**, 1034-1050, doi:10.1101/gr.3715005 (2005).
- 54 Carter, S. L. *et al.* Absolute quantification of somatic DNA alterations in human cancer. *Nature biotechnology* **30**, 413-421, doi:10.1038/nbt.2203 (2012).
- 55 Beroukhi, R. *et al.* Assessing the significance of chromosomal aberrations in cancer: methodology and application to glioma. *Proceedings of the National Academy of Sciences of the United States of America* **104**, 20007-20012, doi:10.1073/pnas.0710052104 (2007).
- 56 Yoda, A. *et al.* Mutations in G protein beta subunits promote transformation and kinase inhibitor resistance. *Nature medicine* **21**, 71-75, doi:10.1038/nm.3751 (2015).
- 57 Hammerman, P. S. *et al.* Mutations in the DDR2 kinase gene identify a novel therapeutic target in squamous cell lung cancer. *Cancer discovery* **1**, 78-89, doi:10.1158/2159-8274.CD-11-0005 (2011).



- 58 Lane, A. A. *et al.* Triplication of a 21q22 region contributes to B cell transformation through HMGN1 overexpression and loss of histone H3 Lys27 trimethylation. *Nature genetics* **46**, 618-623, doi:10.1038/ng.2949 (2014).
